# Supplementary material
Source: PubMed Central journal article supplement (PMC6713605)
Supplement: NIHMS1525777-supplement-Supplemental_Digital_Content_to_Be_Published__cited_in_text__2.pdf [file NIHMS1525777-supplement-Supplemental_Digital_Content_to_Be_Published__cited_in_text__2.pdf]

# Figure S1

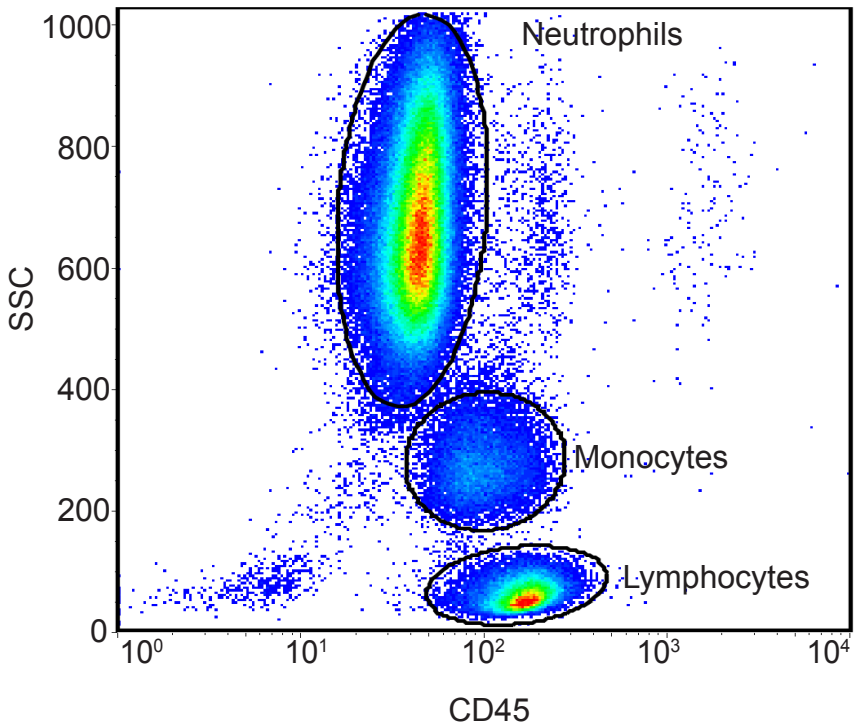

Figure S1: Gating strategy for clarifying monocyte, lymphocyte, and neutrophil populations in peripheral blood samples via flow cytometry. Neutrophil population was identified by forward and side scatter profile, CD45+, CD11b+, CD32+, CD177+, reduced positive correlation for CD14 (compared to monocytes), CD3-, CD19-, and CD20-. Monocyte population was identified by forward and side scatter profile, CD45+, CD3-, CD19-, and CD20-.

**Table S1: Differences in expression of specific inflammatory markers in Brain Death and Sham compared to naive kidney tissue**

| Gene                         | BD (n=16) vs Naïve (n=12) |          |          | Sham (n=6) vs Naïve (n=12) |          |          |
|------------------------------|---------------------------|----------|----------|----------------------------|----------|----------|
|                              | FC                        | p value  | FDR      | FC                         | p value  | FDR      |
| <b>Inflammation</b>          |                           |          |          |                            |          |          |
| CASP1                        | 2.15                      | 4.30E-05 | 4.20E-03 | 1.57                       | 3.30E-02 | 3.44E-01 |
| CASP4                        | 1.42                      | 6.82E-01 | 8.96E-01 | 1.87                       | 7.17E-01 | 9.43E-01 |
| CASP5                        | 1.33                      | 1.86E-01 | 5.52E-01 | 1.25                       | 2.07E-01 | 6.91E-01 |
| CCL2                         | 8.63                      | 5.53E-11 | 3.44E-07 | 3.79                       | 6.12E-05 | 1.51E-02 |
| CXCL8                        | 1.68                      | 4.20E-05 | 4.20E-03 | 1.42                       | 3.40E-02 | 3.47E-01 |
| IFNG                         | 1.08                      | 2.28E-01 | 6.02E-01 | 1.08                       | 6.49E-01 | 9.24E-01 |
| IL10                         | -1.12                     | 9.36E-01 | 9.83E-01 | 1.11                       | 6.79E-01 | 9.30E-01 |
| IL12A                        | -1.01                     | 7.07E-01 | 9.06E-01 | -1.02                      | 8.70E-01 | 9.78E-01 |
| IL12B                        | -1.1                      | 9.76E-01 | 9.93E-01 | -1.01                      | 9.52E-01 | 9.93E-01 |
| IL17A                        | -1.22                     | 4.12E-01 | 7.56E-01 | -1.11                      | 4.34E-01 | 8.44E-01 |
| IL1B                         | 1.41                      | 3.13E-02 | 2.29E-01 | 1.28                       | 1.17E-01 | 5.63E-01 |
| IL6                          | 4.56                      | 2.15E-05 | 2.70E-03 | 1.65                       | 1.83E-01 | 6.63E-01 |
| TNF                          | 1.16                      | 7.98E-02 | 3.70E-01 | 1.21                       | 2.88E-02 | 3.27E-01 |
| <b>Macrophage expression</b> |                           |          |          |                            |          |          |
| CCL11                        | 3.33                      | 1.88E-07 | 1.00E-04 | 2.98                       | 9.18E-05 | 1.93E-02 |
| CCL17                        | -1.04                     | 7.69E-01 | 9.32E-01 | 1.09                       | 4.93E-01 | 8.70E-01 |
| CD14                         | 1.93                      | 8.40E-01 | 9.55E-01 | 1.35                       | 3.32E-01 | 7.85E-01 |
| CD68                         | 1.55                      | 6.20E-03 | 9.49E-02 | 1.4                        | 7.94E-02 | 4.90E-01 |
| CD80                         | 1.05                      | 7.54E-01 | 9.27E-01 | 1.03                       | 6.78E-01 | 9.30E-01 |
| EGR1                         | 2.38                      | 1.80E-03 | 4.61E-02 | 1.67                       | 1.43E-01 | 6.06E-01 |
| IL12B                        | -1.1                      | 9.76E-01 | 9.93E-01 | -1.01                      | 9.52E-01 | 9.93E-01 |
| IL1R1                        | 1.96                      | 7.91E-01 | 9.39E-01 | 2.19                       | 9.50E-01 | 9.93E-01 |
| MRC1L1                       | 1.13                      | 5.17E-01 | 8.18E-01 | 1.71                       | 4.94E-01 | 8.70E-01 |
| NR4A1                        | 1.41                      | 3.70E-03 | 7.09E-02 | 1.48                       | 3.78E-02 | 3.61E-01 |
| SOCS3                        | 1.57                      | 8.00E-04 | 2.80E-02 | 1.22                       | 1.95E-01 | 6.76E-01 |
| TGM2                         | 1.43                      | 5.07E-02 | 2.94E-01 | 1.34                       | 2.30E-01 | 7.13E-01 |
| TLR1                         | 1.18                      | 7.90E-03 | 1.08E-01 | -1.01                      | 9.56E-01 | 9.94E-01 |
| TLR2                         | 1.43                      | 8.83E-02 | 3.90E-01 | -1.12                      | 6.70E-01 | 9.29E-01 |
| TLR8                         | -1.02                     | 9.77E-01 | 9.94E-01 | -1.08                      | 2.38E-01 | 7.21E-01 |
| MAMU-DQA1                    | -1.08                     | 9.30E-02 | 3.99E-01 | -1.31                      | 3.60E-03 | 1.28E-01 |
| MAMU-DMA                     | 1.42                      | 5.09E-02 | 2.95E-01 | -1.01                      | 6.03E-01 | 9.11E-01 |
| MAMU-DOB                     | 1.2                       | 9.44E-02 | 4.03E-01 | 1.01                       | 9.84E-01 | 9.98E-01 |
| MAMU-DPB                     | 1.39                      | 2.40E-03 | 5.46E-02 | 1.24                       | 1.35E-01 | 5.94E-01 |
| MAMU-DQB1                    | 1.53                      | 2.14E-02 | 1.88E-01 | 1.17                       | 7.67E-01 | 9.55E-01 |
| MAMU-DRB1                    | 1.31                      | 2.44E-02 | 2.01E-01 | 1.03                       | 8.03E-01 | 9.62E-01 |
| MAMU-DMB                     | 1.56                      | 4.80E-03 | 8.28E-02 | 1.26                       | 1.76E-01 | 6.54E-01 |
| <b>Neutrophil expression</b> |                           |          |          |                            |          |          |
| C3AR1                        | 1.51                      | 8.75E-02 | 3.89E-01 | 1.16                       | 8.77E-01 | 9.80E-01 |
| MME                          | -1.17                     | 1.33E-01 | 4.71E-01 | 1.43                       | 2.61E-01 | 7.37E-01 |
| SELL                         | 1.12                      | 0.6125   | 0.8643   | 1.5                        | 0.0317   | 0.3388   |
| ITGAM                        | 1.17                      | 0.6685   | 0.8905   | 1.03                       | 0.6773   | 0.93     |
| CSF2RB                       | 1.2                       | 0.0665   | 0.3404   | 1.18                       | 0.2107   | 0.6942   |
| CSF3R                        | 1.06                      | 0.8703   | 0.963    | 1.16                       | 0.6603   | 0.927    |
| FCGR3                        | 2.08                      | 0.8862   | 0.9684   | 1.75                       | 0.9112   | 0.9879   |
| FCGRT                        | -1.45                     | 0.0493   | 0.2897   | -1.58                      | 0.0103   | 0.215    |
| FPR1                         | 1.02                      | 0.5514   | 0.8353   | -1.09                      | 0.6369   | 0.9208   |
| IL1R2                        | -1.11                     | 0.0059   | 0.0934   | -1.09                      | 0.0295   | 0.3281   |
| IL1RN                        | 1.42                      | 0.046    | 0.2787   | 1.17                       | 0.0497   | 0.4046   |
| IL8RB                        | -1.33                     | 0.0157   | 0.1592   | 1.19                       | 0.9516   | 0.9932   |
| MPO                          | -1.05                     | 0.8082   | 0.9456   | 1.11                       | 0.414    | 0.8329   |

**Table S1:** Transcription analysis shows that genes in renal tissue related to inflammation – including CXCL8, CCL2, and CASP1 – are significantly upregulated in BD and sham compared to naïve, with intensified expression in BD conditions. Macrophage and neutrophil gene markers present only minimal evidence of condition-related changes.

**Table S2: Specific markers of Complement, Contact, and Coagulation related pathways genes in Brain Death and Sham kidneys vs naïve kidney expression**

| Gene                | BD (n=16) vs Naïve (n=12) |          |          | Sham (n=6) vs Naïve (n=12) |          |          |
|---------------------|---------------------------|----------|----------|----------------------------|----------|----------|
|                     | FC                        | p value  | FDR      | FC                         | p value  | FDR      |
| <b>Complement</b>   |                           |          |          |                            |          |          |
| C1QA                | 1.07                      | 6.12E-01 | 8.64E-01 | -1.08                      | 6.12E-01 | 8.64E-01 |
| LOC718307; C1QC     | 1.41                      | 9.21E-01 | 9.78E-01 | 1.24                       | 9.21E-01 | 9.78E-01 |
| C1QL2               | -1.08                     | 8.22E-01 | 9.51E-01 | -1.1                       | 8.22E-01 | 9.51E-01 |
| C1QL3               | -1.04                     | 8.70E-01 | 9.63E-01 | 1.12                       | 8.70E-01 | 9.63E-01 |
| C1R                 | 1.83                      | 5.48E-01 | 8.33E-01 | 2.44                       | 5.48E-01 | 8.33E-01 |
| C1S                 | 1.39                      | 2.46E-01 | 6.19E-01 | 2.66                       | 2.46E-01 | 6.19E-01 |
| C1S                 | -1.13                     | 2.01E-01 | 5.72E-01 | 1.6                        | 2.01E-01 | 5.72E-01 |
| C3                  | 1.43                      | 8.96E-02 | 3.92E-01 | 2.09                       | 8.96E-02 | 3.92E-01 |
| C3                  | 1.34                      | 1.08E-01 | 4.29E-01 | 2.43                       | 1.08E-01 | 4.29E-01 |
| C5                  | -1.99                     | 1.83E-05 | 2.40E-03 | -2.1                       | 1.83E-05 | 2.40E-03 |
| C5AR1               | 2.2                       | 3.00E-04 | 1.61E-02 | 1.41                       | 3.00E-04 | 1.61E-02 |
| C6                  | 1.13                      | 1.94E-02 | 1.77E-01 | 1.34                       | 1.94E-02 | 1.77E-01 |
| C7                  | 1.3                       | 1.50E-01 | 4.99E-01 | 1.57                       | 1.50E-01 | 4.99E-01 |
| C8A                 | 1.07                      | 1.05E-02 | 1.27E-01 | 1.18                       | 1.05E-02 | 1.27E-01 |
| C8B                 | -1.05                     | 5.10E-03 | 8.61E-02 | -1.2                       | 5.10E-03 | 8.61E-02 |
| C9                  | -1.87                     | 1.23E-02 | 1.38E-01 | -1.75                      | 1.23E-02 | 1.38E-01 |
| CFB                 | 3.37                      | 8.68E-01 | 9.63E-01 | 5.15                       | 8.68E-01 | 9.63E-01 |
| MASP2; LOC722714    | 1.07                      | 1.74E-02 | 1.67E-01 | 1.19                       | 1.74E-02 | 1.67E-01 |
| MBL2                | 1.17                      | 1.46E-02 | 1.53E-01 | 1.15                       | 1.46E-02 | 1.53E-01 |
| <b>Coagulation</b>  |                           |          |          |                            |          |          |
| VWF; LOC723248      | 1.05                      | 2.29E-01 | 6.02E-01 | 1.29                       | 1.73E-01 | 6.49E-01 |
| F10                 | -2.88                     | 7.00E-04 | 2.71E-02 | -2.08                      | 4.54E-02 | 3.91E-01 |
| F7                  | -1.5                      | 1.00E-03 | 3.27E-02 | -1.4                       | 2.24E-02 | 2.95E-01 |
| F8; LOC100424151    | -1.32                     | 5.00E-03 | 8.55E-02 | 1.07                       | 2.62E-01 | 7.38E-01 |
| F9                  | -1.01                     | 7.10E-03 | 1.02E-01 | -1.04                      | 2.63E-02 | 3.15E-01 |
| F11                 | 1.12                      | 1.21E-02 | 1.38E-01 | 1.08                       | 3.85E-02 | 3.65E-01 |
| FGA                 | -1.06                     | 5.10E-03 | 8.61E-02 | 1.01                       | 3.51E-02 | 3.51E-01 |
| FGB                 | 1.07                      | 1.03E-02 | 1.25E-01 | 1.53                       | 9.26E-02 | 5.16E-01 |
| FGG                 | -1.11                     | 6.10E-03 | 9.40E-02 | -1.11                      | 2.02E-02 | 2.83E-01 |
| <b>Fibrinolysis</b> |                           |          |          |                            |          |          |
| PLG                 | -4.82                     | 5.90E-03 | 9.34E-02 | -1.61                      | 6.57E-01 | 9.26E-01 |
| PLAU                | 1.93                      | 1.34E-02 | 1.46E-01 | 1.36                       | 2.00E-01 | 6.82E-01 |
| PLAT                | 1.22                      | 0.0609   | 0.3246   | 1.63                       | 0.0121   | 0.2302   |
| <b>Contact</b>      |                           |          |          |                            |          |          |
| F12                 | -1.05                     | 3.70E-03 | 7.10E-02 | -1.04                      | 2.35E-02 | 2.99E-01 |
| KLKB1               | -4.86                     | 2.00E-04 | 1.24E-02 | -4.61                      | 3.40E-03 | 1.23E-01 |
| KNG1                | -1.98                     | 0.0003   | 0.0165   | -1.69                      | 0.0393   | 0.3683   |
| SERPING1            | 1.43                      | 2.77E-01 | 6.49E-01 | 1.81                       | 3.54E-01 | 8.00E-01 |
| BDKRB2              | 2.22                      | 0.0463   | 0.2801   | 1.54                       | 0.4023   | 0.8288   |

**Table S2:** Transcription analysis of genes in renal tissue related to complement, contact, or coagulation pathways demonstrate only minor changes in expression in BD and sham vs naïve samples. These pathways are regulated at the level of protein, which are mainly expressed in liver rather than kidney.

**Table S3: Specific markers of acute kidney injury related genes in Brain Death and Sham kidneys vs naïve kidney expression**

| Gene               | BD (n=16) vs Naïve (n=12) |          |          | Sham (n=6) vs Naïve (n=12) |          |          |
|--------------------|---------------------------|----------|----------|----------------------------|----------|----------|
|                    | FC                        | p value  | FDR      | FC                         | p value  | FDR      |
| <b>Complement</b>  |                           |          |          |                            |          |          |
| SPP1               | 27.99                     | 4.09E-13 | 7.64E-09 | 28.19                      | 7.35E-11 | 2.75E-06 |
| HAVCR1             | 19.88                     | 2.06E-09 | 5.14E-06 | 16.85                      | 1.64E-07 | 3.00E-04 |
| LGALS3             | 4.77                      | 2.03E-07 | 1.00E-04 | 3.69                       | 3.58E-05 | 1.04E-02 |
| CYR61              | 3.61                      | 1.45E-07 | 1.00E-04 | 2.12                       | 3.36E-02 | 3.46E-01 |
| TNC; LOC100427764  | 3.15                      | 1.64E-02 | 1.63E-01 | 2.75                       | 2.08E-01 | 6.91E-01 |
| ANXA3              | 2.82                      | 9.49E-07 | 3.00E-04 | 2.1                        | 5.00E-03 | 1.51E-01 |
| CXCL1              | 2.47                      | 1.00E-04 | 8.90E-03 | 2.7                        | 5.70E-03 | 1.62E-01 |
| EGR1               | 2.38                      | 1.80E-03 | 4.61E-02 | 1.67                       | 1.43E-01 | 6.06E-01 |
| ACTA2              | 2.24                      | 1.30E-03 | 3.81E-02 | 2.22                       | 1.31E-02 | 2.38E-01 |
| PEA15              | 2.07                      | 4.36E-06 | 1.00E-03 | 1.39                       | 6.53E-02 | 4.53E-01 |
| CLDN7              | 2.07                      | 1.44E-05 | 2.00E-03 | 1.7                        | 2.50E-03 | 1.07E-01 |
| IER2; LOC100423359 | 1.92                      | 2.03E-06 | 5.00E-04 | 1.31                       | 2.09E-01 | 6.92E-01 |
| TNFRSF1A           | 1.85                      | 4.00E-04 | 1.80E-02 | 1.78                       | 7.00E-04 | 5.51E-02 |
| CLU                | 1.84                      | 3.16E-02 | 2.30E-01 | 1.19                       | 8.16E-01 | 9.66E-01 |
| AKAP12             | 1.83                      | 5.00E-04 | 2.02E-02 | 1.18                       | 4.59E-01 | 8.55E-01 |
| VCAM1              | 1.76                      | 7.40E-03 | 1.04E-01 | 1.23                       | 4.21E-01 | 8.38E-01 |
| FOSL1              | 1.76                      | 3.00E-04 | 1.51E-02 | 1.31                       | 1.19E-01 | 5.67E-01 |
| A2M                | 1.69                      | 8.79E-01 | 9.67E-01 | 2.04                       | 1.84E-01 | 6.64E-01 |
| CDKN1A             | 1.57                      | 2.96E-01 | 6.66E-01 | 1.99                       | 1.16E-01 | 5.61E-01 |
| ANXA2              | 1.52                      | 9.83E-06 | 1.60E-03 | 1.21                       | 3.43E-02 | 3.49E-01 |
| HMOX1              | 1.33                      | 2.36E-01 | 6.11E-01 | 3.19                       | 1.00E-03 | 6.94E-02 |
| FOS                | 1.3                       | 8.60E-02 | 3.85E-01 | 1.36                       | 2.37E-01 | 7.20E-01 |
| SRXN1              | 1.3                       | 1.19E-01 | 4.48E-01 | 2.23                       | 3.40E-03 | 1.23E-01 |
| SPHK1              | 1.28                      | 9.50E-03 | 1.19E-01 | 1.14                       | 6.44E-01 | 9.23E-01 |
| MYO5A              | 1.27                      | 5.49E-01 | 8.34E-01 | 1.34                       | 6.75E-02 | 4.59E-01 |
| TUBB               | 1.26                      | 2.21E-01 | 5.93E-01 | 1.16                       | 4.64E-01 | 8.58E-01 |
| BCAT1              | 1.19                      | 2.06E-02 | 1.83E-01 | 1.2                        | 1.60E-01 | 6.32E-01 |
| SLC16A7            | 1.07                      | 2.34E-01 | 6.09E-01 | -1.21                      | 6.95E-01 | 9.35E-01 |
| EGF                | 1.06                      | 2.88E-01 | 6.58E-01 | 1.12                       | 3.61E-01 | 8.05E-01 |
| COL3A1             | -1.06                     | 5.87E-01 | 8.52E-01 | -1.66                      | 2.92E-02 | 3.27E-01 |
| IL18               | -1.07                     | 9.40E-02 | 4.02E-01 | -1.36                      | 2.40E-02 | 3.02E-01 |
| COL18A1            | -1.1                      | 8.93E-02 | 3.92E-01 | -1.08                      | 2.49E-01 | 7.28E-01 |
| LIFR               | -1.3                      | 5.22E-02 | 2.99E-01 | -1.56                      | 5.85E-02 | 4.33E-01 |
| AQP1               | -1.52                     | 1.81E-01 | 5.45E-01 | -1.02                      | 6.15E-02 | 4.41E-01 |
| GAS2               | -1.97                     | 3.90E-03 | 7.32E-02 | -2.69                      | 4.70E-03 | 1.46E-01 |
| AFM                | -4.29                     | 1.30E-03 | 3.77E-02 | -1.54                      | 6.01E-01 | 9.10E-01 |

**Table S3:** Transcription analysis of genes in renal tissue related to AKI, particularly SPP1 and HAVCR1 (KIM1) along with a variety of mitogens, show increased expression in both BD and sham conditions compared to naïve.
